# Supplementary material
Source: MDPI journal article supplement (https://www.mdpi.com/2304-6732/9/3/183)

Supporting Information

**D- $\pi$ -A- $\pi$ -D initiators based on benzophenone  
conjugate extension for two-photon  
polymerization additive manufacturing**

Shanggeng Li <sup>1,2</sup>, Xiaolin Liu <sup>3</sup>, Shuai Zhang <sup>2,\*</sup>, Yawen Zhou <sup>2</sup>, Xiangyu Wan <sup>2</sup>, Ning Li <sup>2</sup>,  
Jing Li <sup>2</sup> and Lin Zhang <sup>2</sup>

## Table of contents

|                                                                |     |
|----------------------------------------------------------------|-----|
| I. General remarks.....                                        | S3  |
| II. Synthesis.....                                             | S4  |
| III. Copies of images.....                                     | S7  |
| IV. Copies of photos.....                                      | S9  |
| V. Copies of $^1\text{H}$ and $^{13}\text{C}$ NMR spectra..... | S10 |

## I. General remarks

All reagents were obtained from commercial suppliers and used without further purification.

Table S1 Reagents

|          |                                                    |                                        |
|----------|----------------------------------------------------|----------------------------------------|
| Reagents | 1-Bromo-hexane                                     | Aladdin Industrial Corporation         |
|          | 1-Bromo-dodecane                                   | Aladdin Industrial Corporation         |
|          | 7-Bromomethyl-pentadecane                          | Aladdin Industrial Corporation         |
|          | 9-Bromomethyl-icosane                              | Aladdin Industrial Corporation         |
|          | Diphenyl-amine                                     | Aladdin Industrial Corporation         |
|          | NaH                                                | Shanghai Macklin Biochemical Co., Ltd. |
|          | Na <sub>2</sub> SO <sub>4</sub>                    | Chengdu Kelong Co., Ltd.               |
|          | NBS                                                | Aladdin Industrial Corporation         |
|          | Pd(PPh <sub>3</sub> ) <sub>2</sub> Cl <sub>2</sub> | Ark Pharm                              |
|          | PPh <sub>3</sub>                                   | Aladdin Industrial Corporation         |
|          | KOH                                                | Aladdin Industrial Corporation         |
|          | CuI                                                | Adamas-Beta                            |
|          | Et <sub>3</sub> N                                  | Shanghai Macklin Biochemical Co., Ltd. |

|                |                                |                                        |
|----------------|--------------------------------|----------------------------------------|
|                | Bis-(4-bromo-phenyl)-methanone | Shanghai Macklin Biochemical Co., Ltd. |
|                | Ethynyltrimethylsilane         | Aladdin Industrial Corporation         |
|                | K <sub>2</sub> CO <sub>3</sub> | Aladdin Industrial Corporation         |
| <b>Solvent</b> | Petroleum ether                | Shanghai Titan Scientific Co., Ltd.    |
|                | EA                             | Aladdin Industrial Corporation         |
|                | DMF                            | Aladdin Industrial Corporation         |
|                | THF                            | Aladdin Industrial Corporation         |
|                | DCM                            | Shanghai Macklin Biochemical Co., Ltd. |
|                | MeOH                           | Aladdin Industrial Corporation         |
| <b>Resin</b>   | TMPTA                          | Aladdin Industrial Corporation         |
|                | PETA                           | Aladdin Industrial Corporation         |

## II. Synthesis

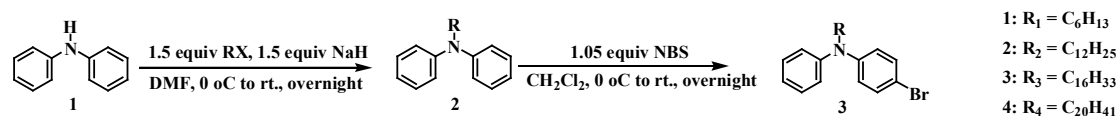

**Figure S1.** Intermediate product **3** synthesis route.

Substrate **1** (10 mmol) and NaH (in 60% mineral oil, 0.6 g, 15 mmol) were added to DMF (30 mL) at 0 °C, and the resulting mixture was stirred for 15 min. Subsequently, bromoalkyl **RX** (15 mmol) was slowly added at 0 °C. The resulting solution was then stirred overnight at room temperature. The reaction solution was quenched with water (100 mL), extracted with EA (100 mL), washed with brine (50 mL×3), and dried over anhydrous  $Na_2SO_4$ . Then the solvent was evaporated, and the residue was purified by silica-gel-column chromatography to provide the desired intermediate product **2**.

NBS (1.87 g, 10.5 mmol) solution in DCM (150 mL) was slowly added to (10 mmol) solution **2** in DCM (100 mL) at 0 °C. The resulting mixture was then stirred overnight at room temperature. The reaction was stopped with water (100 mL), washed with brine (100 mL), and dried on anhydrous  $Na_2SO_4$ . The solvent was evaporated, and the residue was purified by silica gel column chromatography to provide the desired intermediate product **3**.

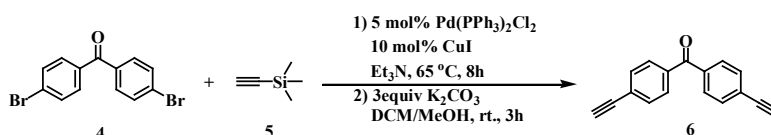

**Figure S2.** Intermediate product **6** synthesis route.

$Pd(PPh_3)_2Cl_2$  (350 mg, 0.5 mmol),  $PPh_3$  (262 mg, 1.0 mmol), CuI (190 mg, 1.0

mmol), bromine material **4** (5 mmol), ethynyltrimethylsilane **5** (1.47 g, 15 mmol), and Et<sub>3</sub>N (50.0 mL) were loaded into a flame-drying sealable tube with a magnetic stirring rod in an Ar atmosphere. The tube was sealed, and the reaction was stirred at 65 °C for 8 h. After cooling to ambient temperature, the reaction solution was diluted with 100 mL of ethyl acetate (EA), filtered through a diatomite pad and washed with EA (50 mL). The solvent was evaporated and the residue added to K<sub>2</sub>CO<sub>3</sub> (4.15 g, 30 mmol), DCM (50 mL) and MeOH (50 mL). The resulting mixture was then stirred at room temperature for 3 h. The reaction solution was filtered through a diatomite pad and washed with 30 mL DCM. The filtrate was evaporated, and the residue was purified by silica-gel-column chromatography to provide the desired intermediate product **6**.

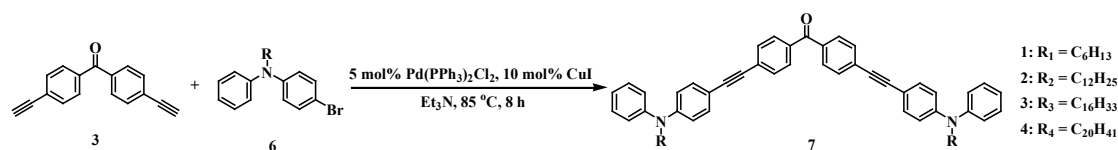

**Figure S3.** Final product **7** synthesis route.

Pd(PPh<sub>3</sub>)<sub>2</sub>Cl<sub>2</sub> (35 mg, 0.05 mmol), PPh<sub>3</sub> (26 mg, 0.10 mmol), CuI (19 mg, 0.10 mmol), bromine material **6** (1.5 mmol), terminal alkyne **3** (230 mg, 0.5 mmol), Et<sub>3</sub>N (5.0 mL) and DMF (10.0 mL) were filled into a flame-drying sealable tube with a magnetic stirring rod in an Ar atmosphere. The tube was sealed, and the reaction was stirred at 90 °C for 8 h. After cooling to ambient temperature, the reaction solution was diluted with 50 mL of ethyl acetate (EA), filtered through a diatomite pad, washed with EA (30 mL) and brine (50 mL×2), and dried on anhydrous Na<sub>2</sub>SO<sub>4</sub>. The solvent was evaporated, and the residue was purified by silica-gel-column chromatography to

provide the desired product 7.

### III. Copies of images

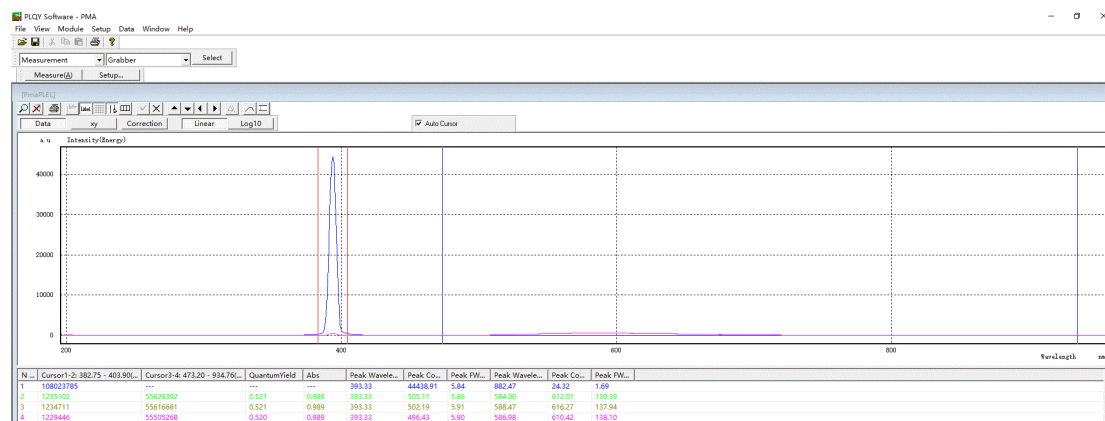

**Figure S4.** The fluorescence quantum yield of BM-PPPM-C6.

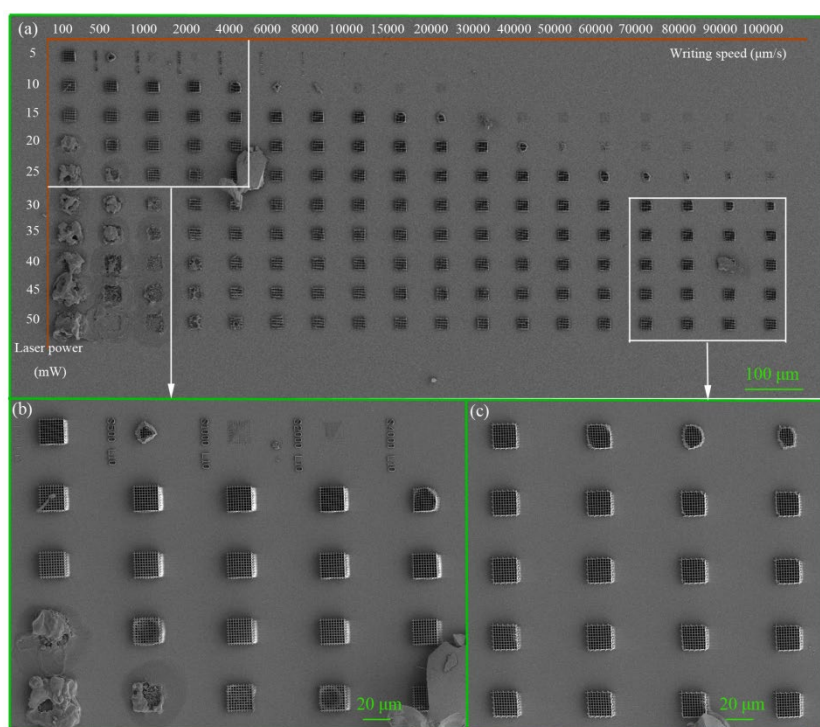

**Figure S5.** SEM images of structures with initiator BM-PPPM-C12 in PMPTA, 10  $\mu\text{mol/g}$ .

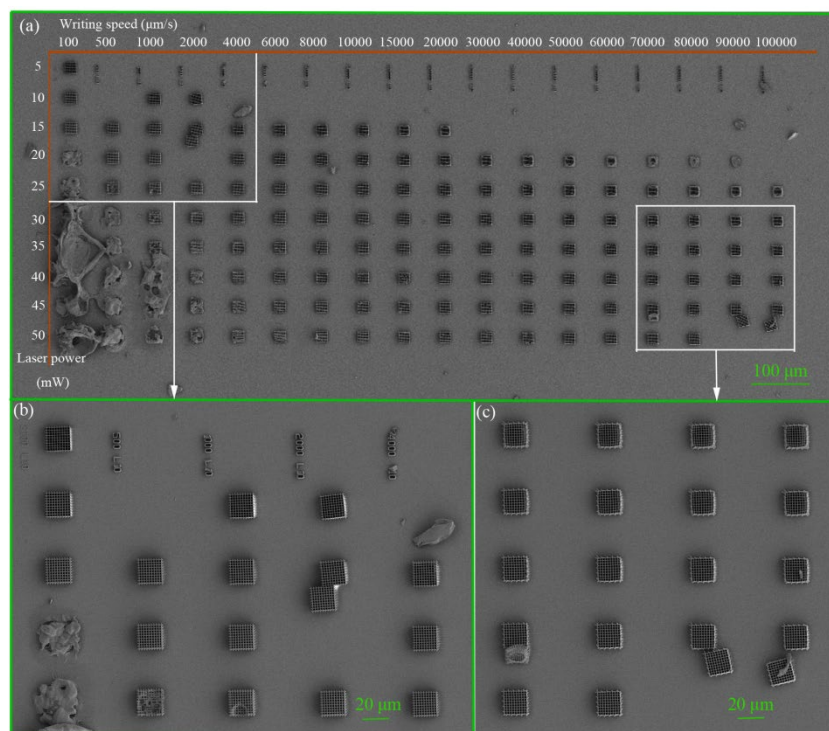

**Figure S6.** SEM images of structures with initiator BM-PPPM-C16 in PMPTA, 10  $\mu\text{mol/g}$ .

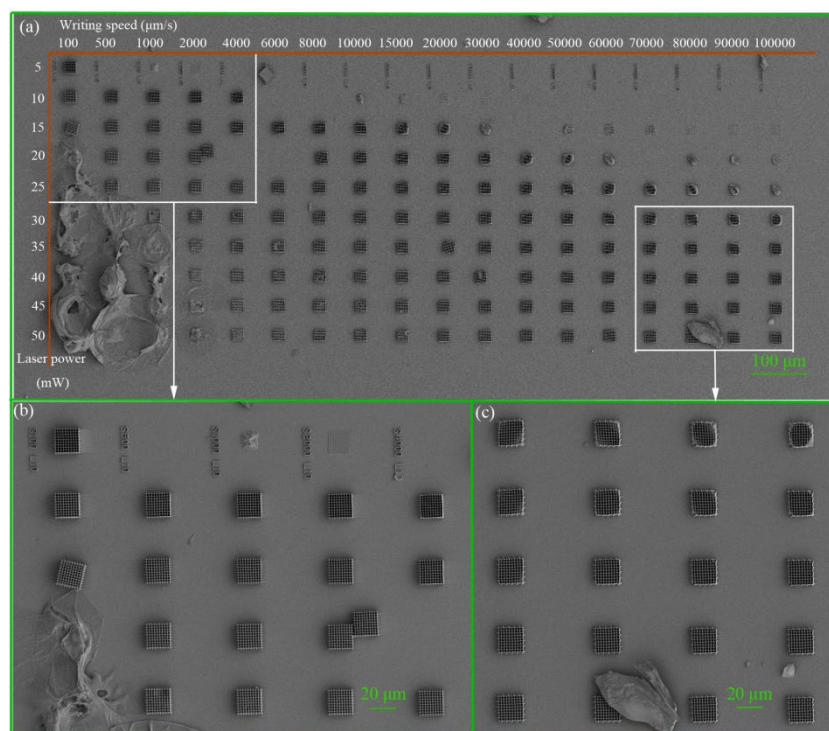

**Figure S7.** SEM images of structures with initiator BM-PPPM-C20 in PMPTA, 10  $\mu\text{mol/g}$ .

$\mu\text{mol/g}$ .

#### IV. Copies of photos

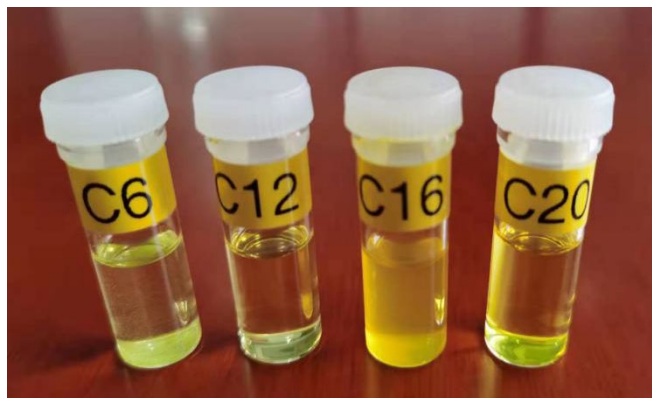

**Figure S8.** Photos showing differences in solubility of different molecules

#### V. Copies of $^1\text{H}$ , and $^{13}\text{C}$ NMR spectra

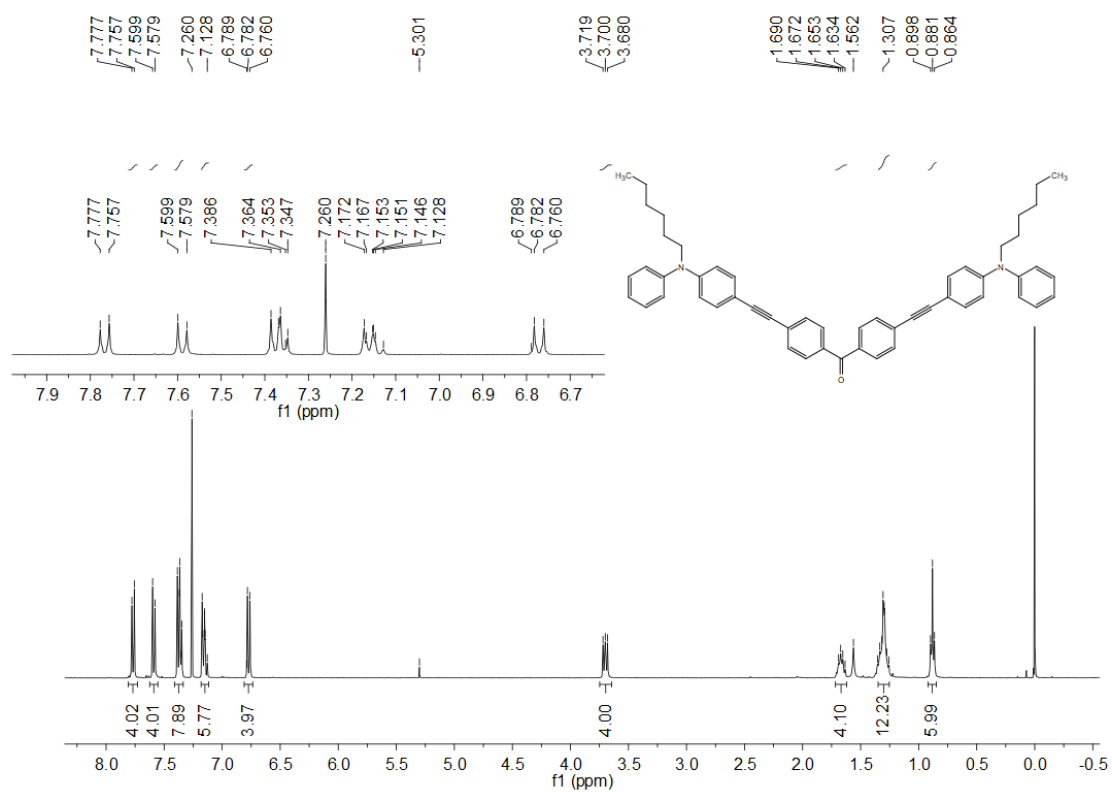

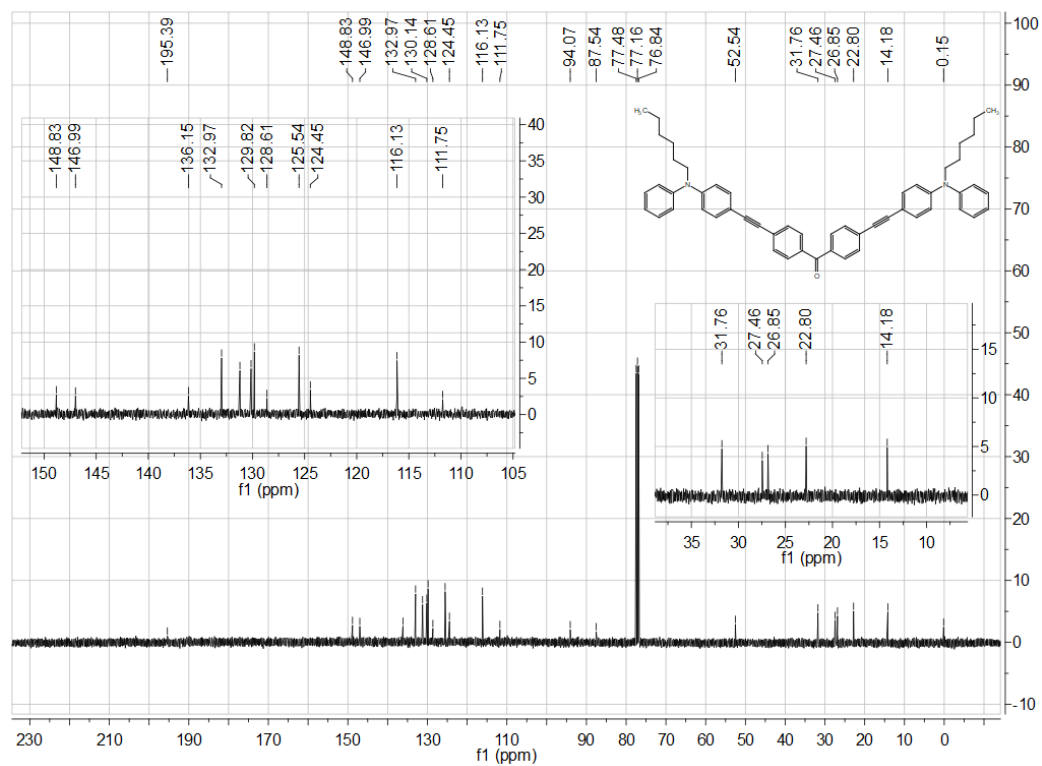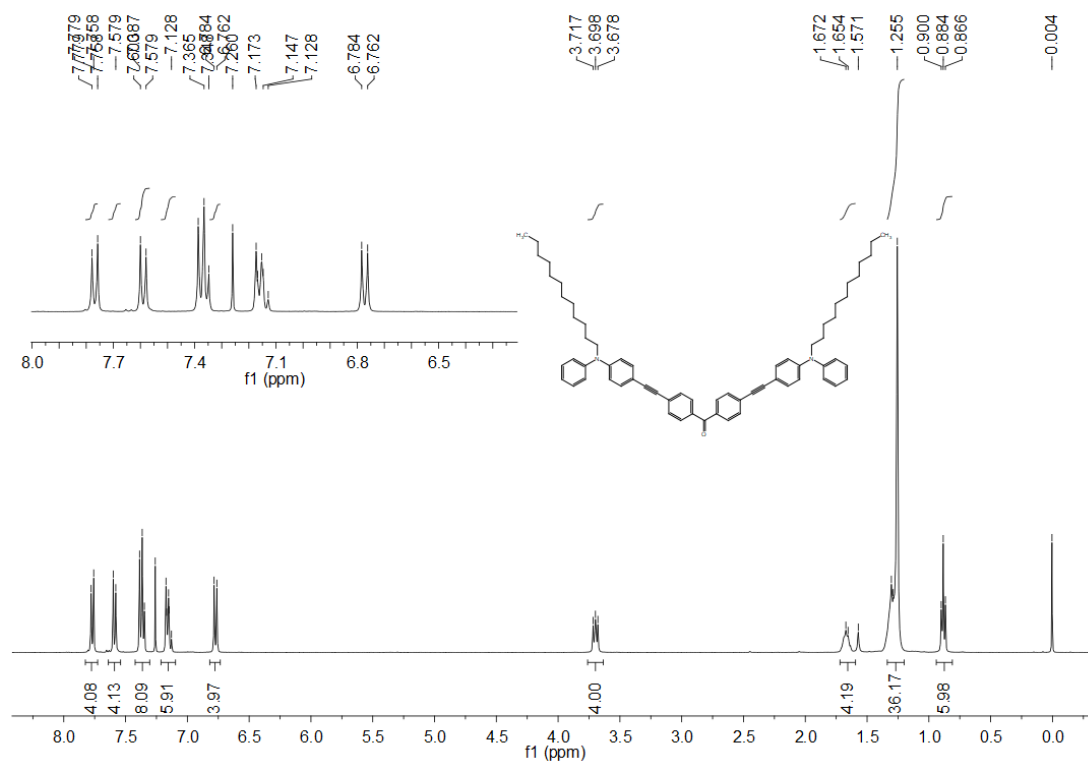

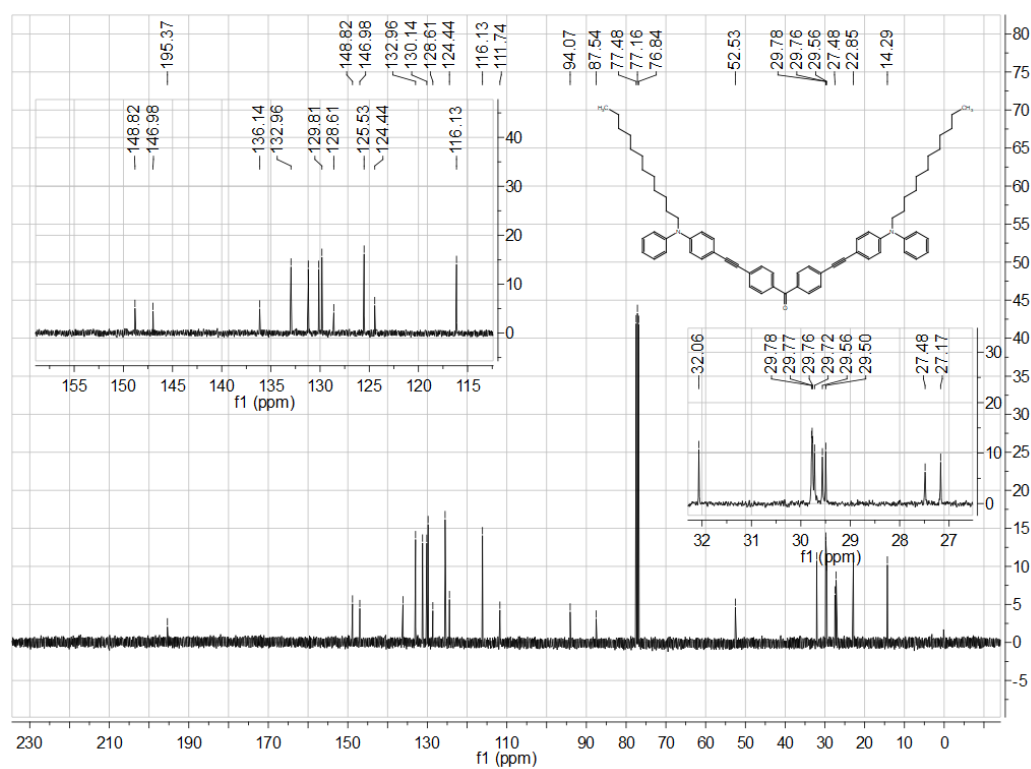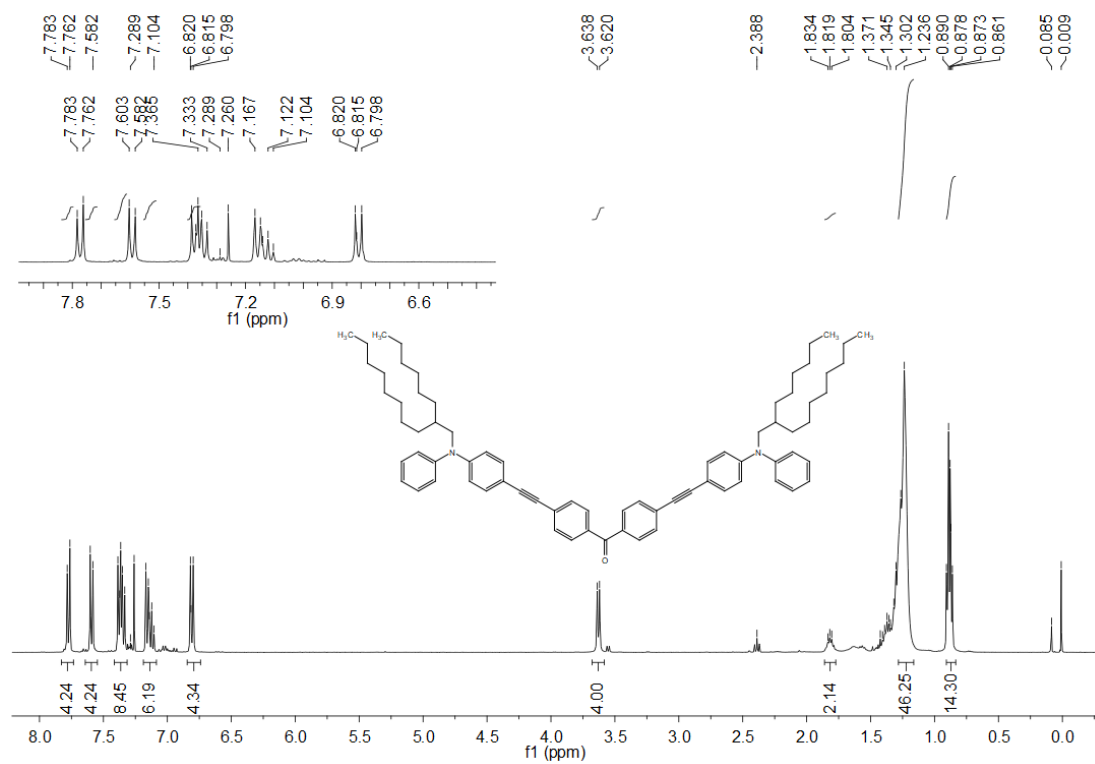

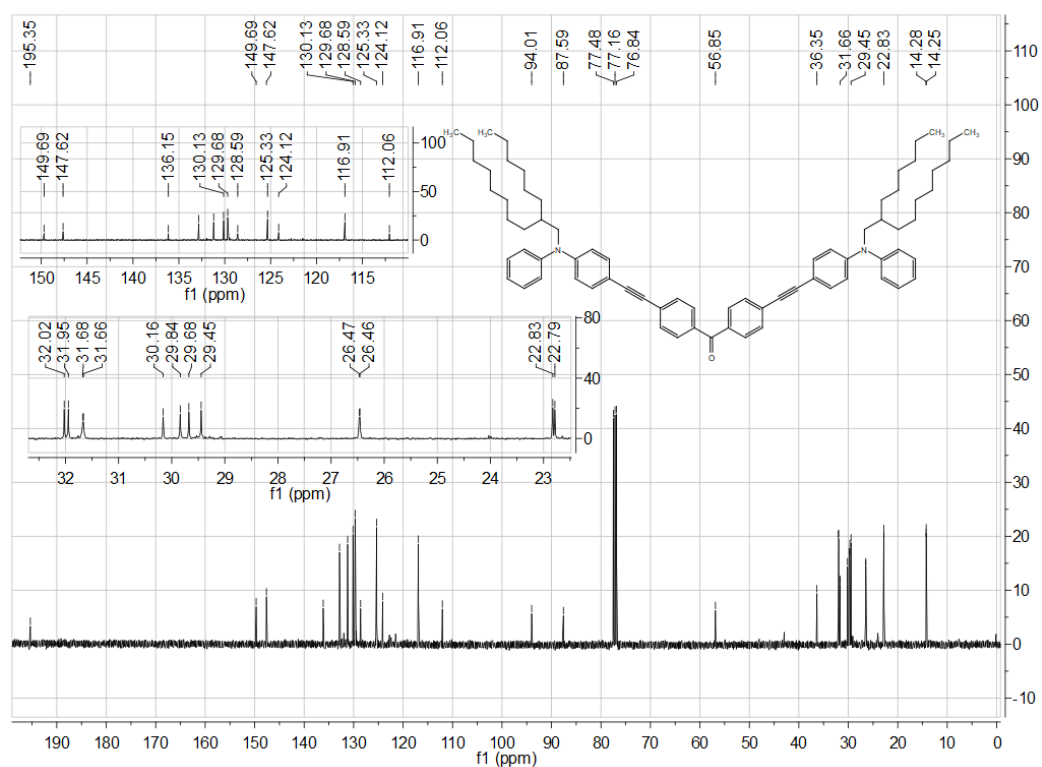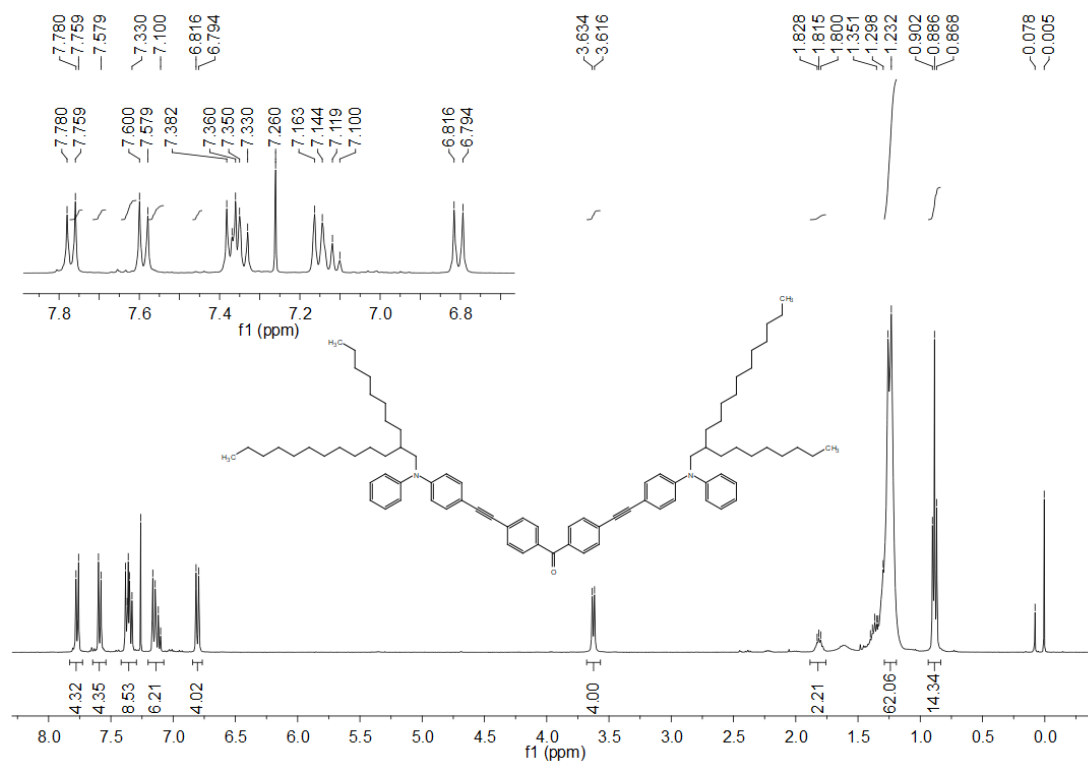

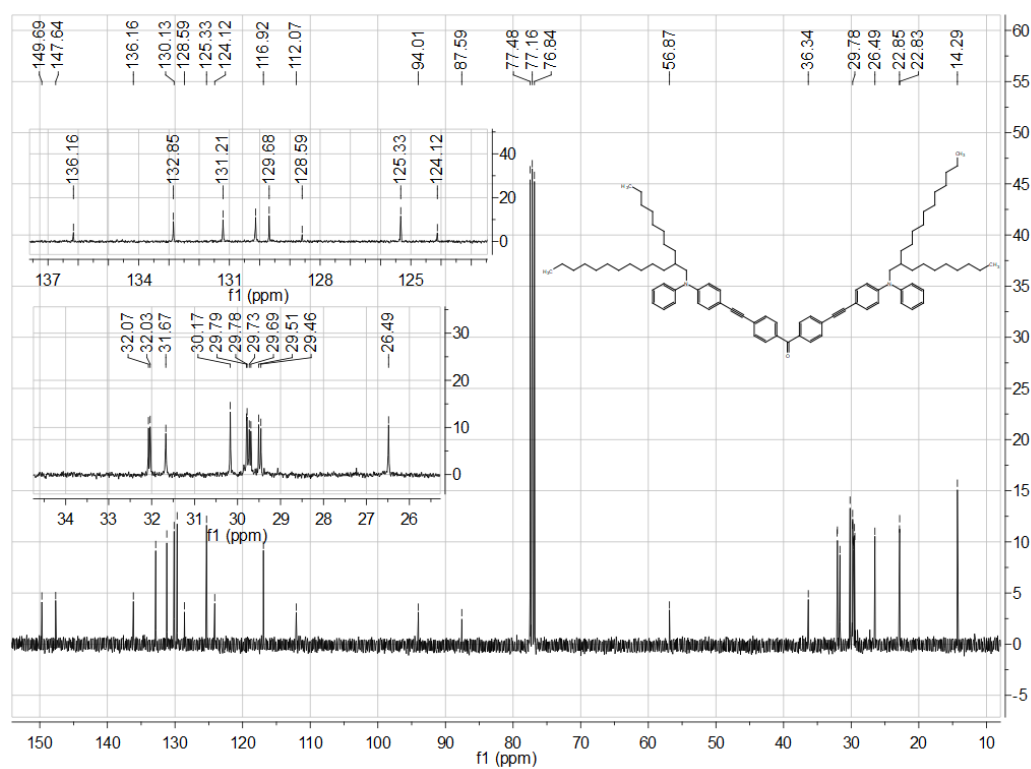

Supplement: s1 [file s1 › photonics-1622843-supplementary.pdf]
